# Supplementary material for: Cell-Free Tumor DNA Detection-Based Liquid Biopsy of Plasma and Bile in Patients with Various Pancreatic Neoplasms
Source: MDPI journal article supplement (doi:10.3390/biomedicines12010220), 2024-01-18
Supplement: s1 [file s1]

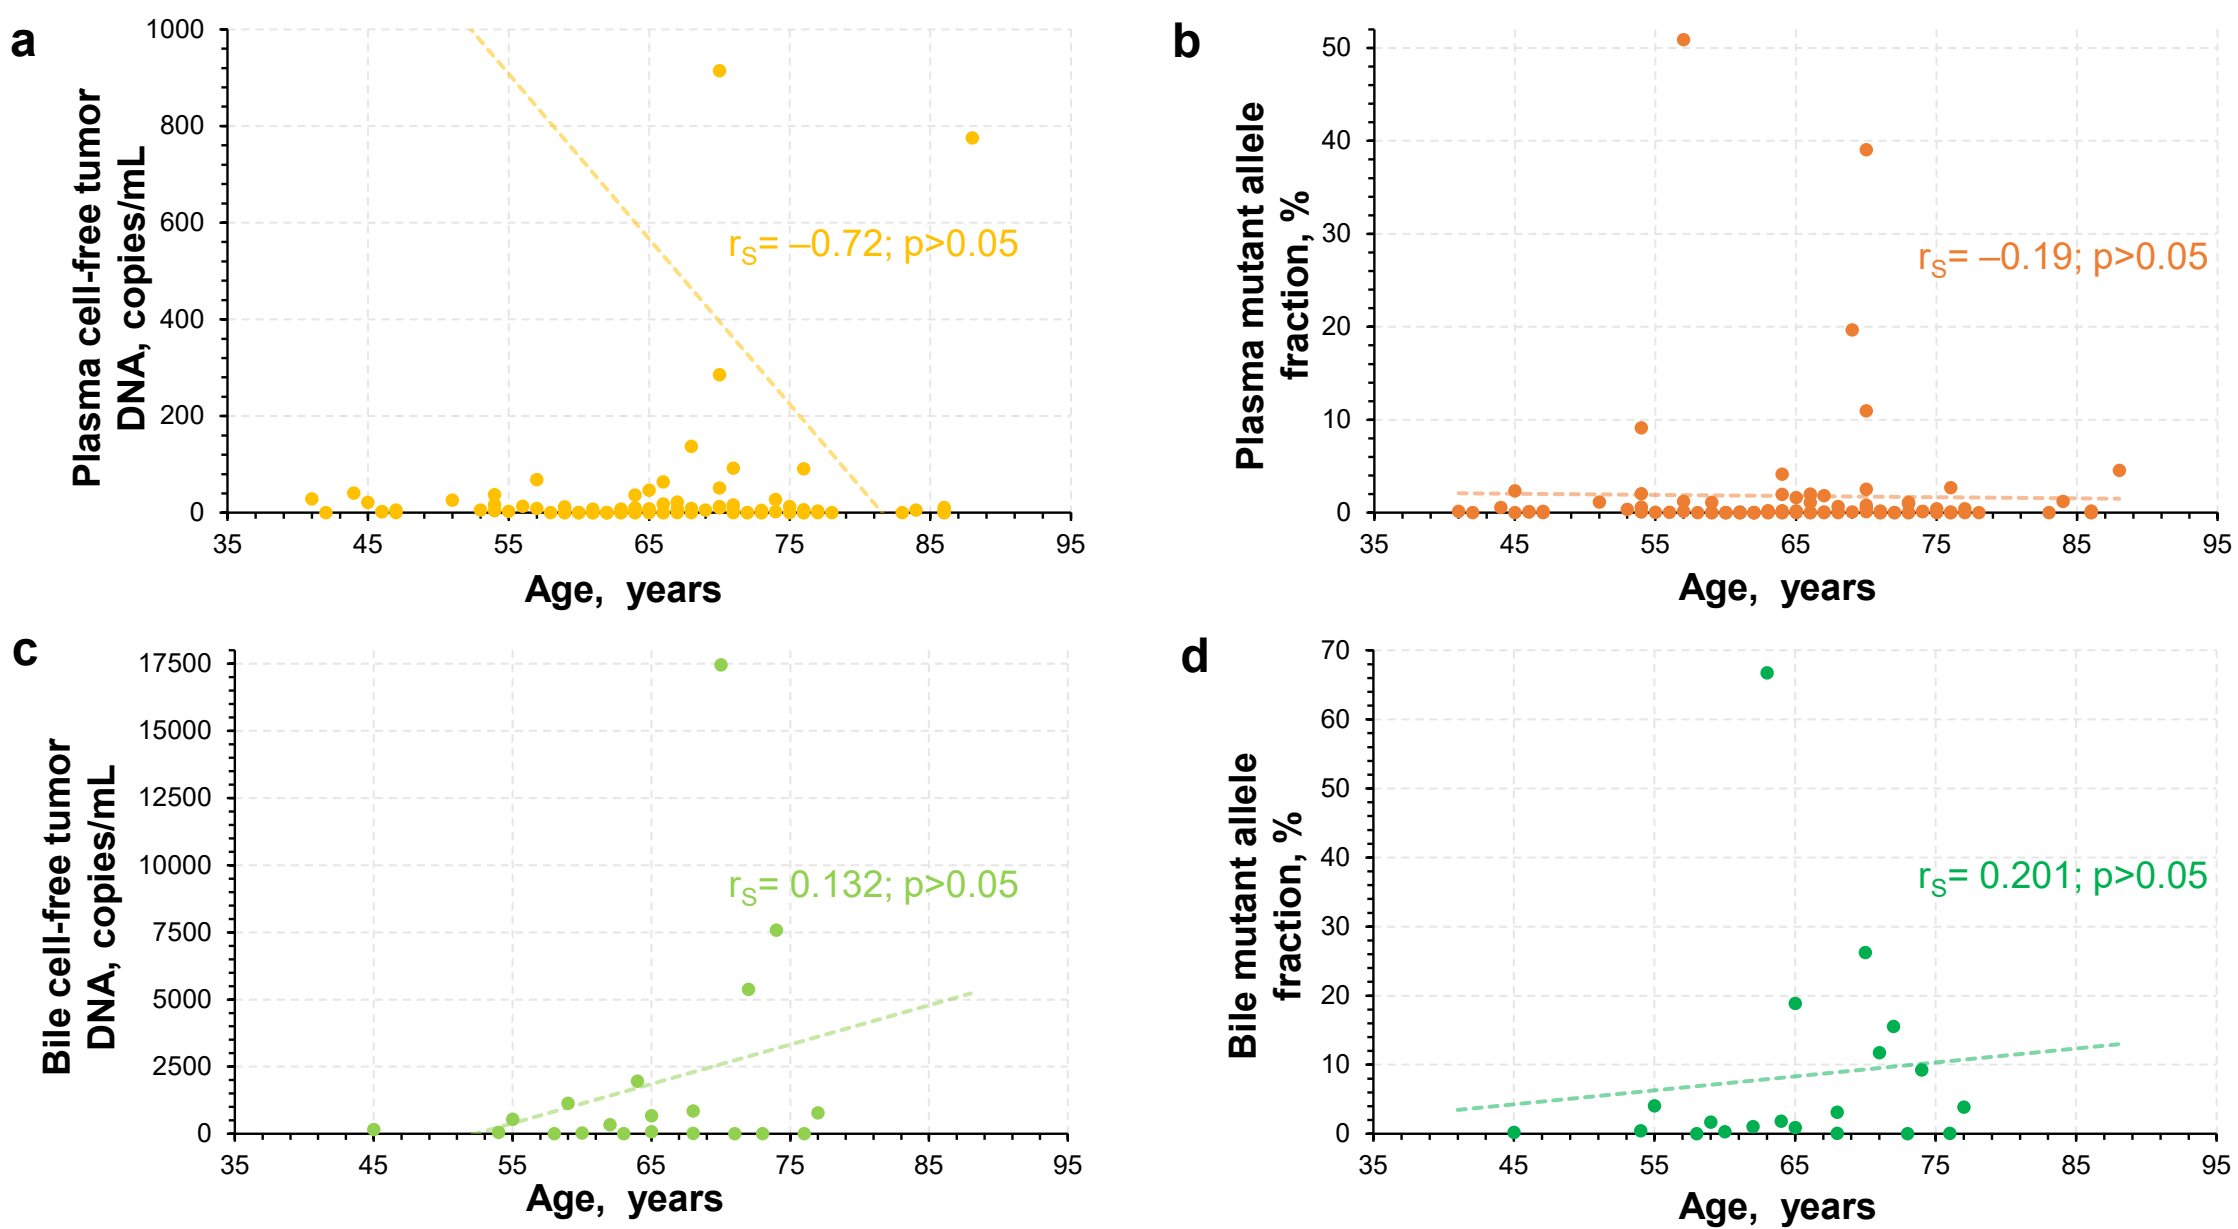

**Figure S4.** Correlation of cell-free DNA analysis results with age in patients with pancreatic ductal adenocarcinoma. **(a)** Scatter plot for cell-free tumor DNA concentration (copies per 1 mL of biomaterial) in plasma (5 outliers with results higher than 1000 copies/mL were excluded in order to preserve the proportions of the plot). **(b)** Scatter plot for mutant allele fraction in plasma. **(c)** Scatter plot for cell-free tumor DNA concentration in bile (copies per 1 mL of biomaterial). **(d)** Scatter plot for mutant allele fraction in bile. Cell-free tumor DNA was detected using digital droplet polymerase chain reaction on a QX200 AutoDG ddPCR System (Bio-Rad Laboratories, Inc) based on presence of common KRAS mutations in G12, G13, Q61 hotspots.  $r_s$  – Spearman's rank correlation coefficient.
