# Supplementary material for: Cell-Free Tumor DNA Detection-Based Liquid Biopsy of Plasma and Bile in Patients with Various Pancreatic Neoplasms
Source: MDPI journal article supplement (doi:10.3390/biomedicines12010220), 2024-01-18
Supplement: s1 [file s1]

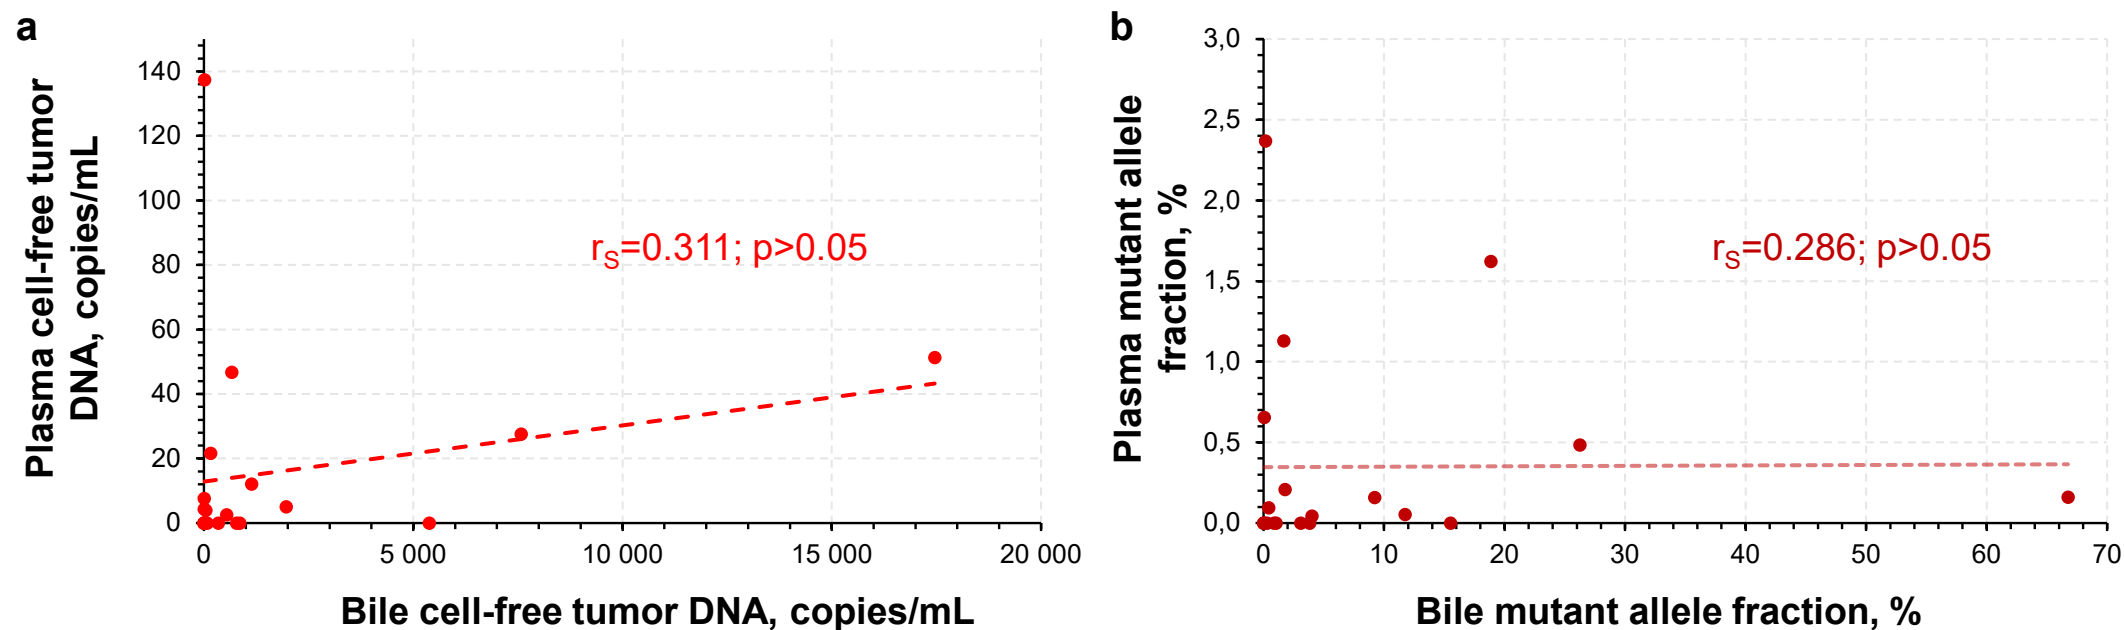

**Figure S1.** Correlation of cell-free DNA analysis results for plasma and bile in patients with pancreatic ductal adenocarcinoma. **(a)** Scatter plot for data presented as copies per 1 mL of biomaterial. **(b)** Scatter plot for data presented as tumor DNA fraction. Cell-free tumor DNA was detected using digital droplet polymerase chain reaction on a QX200 AutoDG ddPCR System (Bio-Rad Laboratories, Inc) based on presence of common KRAS mutations in G12/G13, Q61 hotspots.  $r_s$  – Spearman's rank correlation coefficient.
