# Supplementary material for: Cell-Free Tumor DNA Detection-Based Liquid Biopsy of Plasma and Bile in Patients with Various Pancreatic Neoplasms
Source: Biomedicines. 2024 Jan 18;12(1):220. doi: 10.3390/biomedicines12010220 (PMC10813046; doi:10.3390/biomedicines12010220)
Supplement: Supplementary file 1 [file biomedicines-12-00220-s001.zip]

Archive with 5 entries (5 files):
- Figure S1.pdf
- Figure S2.pdf
- Figure S3.pdf
- Figure S4.pdf
- Table S1_rev.xlsx
