# Supplementary material for: Cell-Free Tumor DNA Detection-Based Liquid Biopsy of Plasma and Bile in Patients with Various Pancreatic Neoplasms
Source: Biomedicines. 2024 Jan 18;12(1):220. doi: 10.3390/biomedicines12010220 (PMC10813046; doi:10.3390/biomedicines12010220)
Supplement: Supplementary file 1 [file biomedicines-12-00220-s001.zip › Table S1_rev.xlsx]

## Sheet: DATA
№	Age	Sex	Neoplasm	Group	Serum СА19-9, U/mL	Tumor localization	Tumor size	Contact with blood vessels	Bile duct invasion	Distant metastases	Plasma_G12/G13_mut (cop./mL)	Plasma_G12/G13_wt (cop./mL)	Plasma_G12/G13_fract (%)	Plasma_Q61_mut (cop./mL)	Plasma_Q61_wt (cop./mL)	Plasma_Q61_fract (%)	Bile_G12/G13_mut (cop./mL)	Bile_G12/G13_wt (cop./mL)	Bile_G12/G13_fract (%)	Bile_Q61_mut (cop./mL)	Bile_Q61_wt (cop./mL)	Bile_Q61_fract (%)	Inclusion date (follow up 20.09.23)	Date of death	Deceased (1-yes; 0-no)
1	63	female	PDAC	PDAC	0.8	head	2-4 cm	1	1	1	7.64	4740	0.160922	0	5040	0	2.73	1.36	66.7482	0	3.36	0	2022-08-01	N/A	N/A
2	70	female	PDAC	PDAC	0.8	head + body	2-4 cm	1	1	0	51.36	10560	0.48401	0	12456	0	17460	49080	26.2399	0	62790	0	2021-12-13	2022-06-01	1
3	65	female	PDAC	PDAC	0.8	head	>4 cm	1	1	0	46.8	2840	1.62117	0	3260	0	665	2860	18.8652	0	3490	0	2022-05-23	2022-12-23	1
4	72	male	PDAC	PDAC	0.8	head	<2 cm	0	1	0	0	5380	0	0	6080	0	5380	29300	15.5133	0	35360	0	2022-04-13	N/A	0
5	71	male	PDAC	PDAC	596	head	>4 cm	1	1	0	4.392	8304	0.0528622	0	9648	0	4.11	30.9	11.7395	0	175.2	0	2022-01-19	N/A	0
6	74	female	PDAC	PDAC	6186	head	2-4 cm	1	1	0	27.6	17440	0.158007	0	18160	0	7580	74640	9.21917	0	82980	0	2022-04-13	N/A	0
7	55	male	PDAC	PDAC	0.8	head + body	>4 cm	1	1	1	2.6	5880	0.0441981	0	6160	0	538	12840	4.02153	0	23.1	0	2022-06-27	N/A	0
8	77	male	PDAC	PDAC	21	head	>4 cm	1	1	1	0	5660	0	0	6360	0	781	19560	3.83954	0	18820	0	2022-10-10	2023-06-25	1
9	68	male	PDAC	PDAC	43	head	2-4 cm	1	1	0	0	14568	0	0	16776	0	852	26700	3.09233	0	26130	0	2022-01-19	N/A	0
10	64	female	PDAC	PDAC	0.8	head + body + tail	>4 cm	1	0	0	5.08	2440	0.207764	0	2640	0	1960	107310	1.79372	0	82650	0	2022-03-24	2023-04-20	1
11	59	female	PDAC	PDAC	782	head	2-4 cm	1	1	0	12.096	1058.4	1.12994	0	446.4	0	15.87	64290	0.0246789	1140	66330	1.68964	2021-12-20	N/A	N/A
12	62	male	PDAC	PDAC	0.8	N/A	N/A	N/A	N/A	N/A	0	12120	0	0	13500	0	340	32340	1.04039	0	32540	0	2022-04-11	N/A	0
13	65	male	PDAC	PDAC	104	head	2-4 cm	1	1	0	0	13280	0	0	9980	0	76	8560	0.880037	0	9608	0	2022-04-22	N/A	0
14	54	female	PDAC	PDAC	1594	head	2-4 cm	1	1	1	3.92	4080	0.0959862	0	4200	0	45.9	10400	0.439407	0	9090	0	2022-07-13	N/A	0
15	60	female	PDAC	PDAC	224	head	2-4 cm	1	1	0	0	3900	0	0	4740	0	31	10820	0.285688	0	10010	0	2022-08-15	2023-02-02	1
16	45	male	PDAC	PDAC	370.9	head	>4 cm	1	1	1	21.6	890	2.36946	0	3240	0	157.2	91710	0.171117	0	56280	0	2022-01-26	2022-08-17	1
17	68	female	PDAC	PDAC	15	head	2-4 cm	1	1	1	137.4	20860	0.654367	0	23600	0	14.64	21820	0.0670494	0	21868	0	2022-04-05	2022-04-09	1
18	76	female	PDAC	PDAC	111	head	>4 cm	1	1	0	0	4220	0	0	4460	0	1.024	2204	0.0464394	0	2208	0	2022-04-27	2023-08-04	1
19	58	male	PDAC	PDAC	151.2	head	2-4 cm	1	1	0	0	506.4	0	0	17112	0	0	1272	0	0	23640	0	2022-02-14	N/A	0
20	73	female	PDAC	PDAC	975	head + body	>4 cm	1	1	1	0	386.4	0	0	1231.2	0	0	70.5	0	0	52.2	0	2022-02-02	2022-02-16	1
21	70	female	PDAC	PDAC	29	tail	>4 cm	1	0	1	0	10580	0	4560	7120	39.0411	N/A	N/A	N/A	N/A	N/A	N/A	2022-06-29	2023-03-15	1
22	88	male	PDAC	PDAC	0.8	head	2-4 cm	1	0	1	0	17320	0	775.2	16200	4.56666	N/A	N/A	N/A	N/A	N/A	N/A	2022-06-08	2022-07-01	1
23	64	male	PDAC	PDAC	7821	body + tail	>4 cm	1	0	1	5.544	127.92	4.15393	6.312	210.48	2.91155	N/A	N/A	N/A	N/A	N/A	N/A	2022-02-03	N/A	0
24	57	male	PDAC	PDAC	34832	head	>4 cm	1	1	1	0	4160	0	68.4	5540	1.2196	N/A	N/A	N/A	N/A	N/A	N/A	2022-12-01	2023-06-01	1
25	70	female	PDAC	PDAC	0.8	N/A	N/A	N/A	N/A	N/A	12.6	1521.6	0.821275	0	1912.8	0	N/A	N/A	N/A	N/A	N/A	N/A	2021-12-27	2022-09-09	1
26	65	female	PDAC	PDAC	39	head	2-4 cm	0	1	0	8.208	4128	0.198443	0	4632	0	N/A	N/A	N/A	N/A	N/A	N/A	2021-12-17	2023-07-08	1
27	64	male	PDAC	PDAC	0.8	tail	2-4 cm	1	0	1	0	753.6	0	0	871.2	0	N/A	N/A	N/A	N/A	N/A	N/A	2021-12-19	2022-01-12	1
28	70	female	PDAC	PDAC	2318	head + body	>4 cm	1	1	0	10.248	8544	0.1198	0	2224.8	0	N/A	N/A	N/A	N/A	N/A	N/A	2021-12-18	2022-01-19	1
29	54	male	PDAC	PDAC	1603	head + body	>4 cm	1	1	1	2424	24096	9.14027	0	29520	0	N/A	N/A	N/A	N/A	N/A	N/A	2021-12-13	N/A	N/A
30	83	male	PDAC	PDAC	0.8	head	>4 cm	0	0	1	0	89832	0	0	97800	0	N/A	N/A	N/A	N/A	N/A	N/A	2021-12-14	2022-02-04	1
31	51	male	PDAC	PDAC	513	body + tail	2-4 cm	1	0	1	25.92	2257.92	1.13493	0	2736	0	N/A	N/A	N/A	N/A	N/A	N/A	2021-12-14	N/A	N/A
32	62	male	PDAC	PDAC	917	head	2-4 cm	0	1	0	0	3240	0	0	3672	0	N/A	N/A	N/A	N/A	N/A	N/A	2021-12-14	N/A	0
33	63	male	PDAC	PDAC	15573	head	>4 cm	1	0	1	4.008	1864.8	0.214468	0	1826.4	0	N/A	N/A	N/A	N/A	N/A	N/A	2021-12-13	N/A	0
34	69	female	PDAC	PDAC	44	head	2-4 cm	1	1	0	5.352	5496	0.0972852	0	7056	0	N/A	N/A	N/A	N/A	N/A	N/A	2021-12-14	2022-06-25	1
35	66	female	PDAC	PDAC	25.9	tail	2-4 cm	1	0	0	0	15456	0	0	16056	0	N/A	N/A	N/A	N/A	N/A	N/A	2021-12-17	N/A	0
36	70	female	PDAC	PDAC	120000	body + tail	2-4 cm	1	0	1	285.6	10944	2.54328	0	11568	0	N/A	N/A	N/A	N/A	N/A	N/A	2021-12-18	N/A	0
37	64	female	PDAC	PDAC	0.8	N/A	N/A	N/A	N/A	N/A	36.72	1821.6	1.97598	0	4152	0	N/A	N/A	N/A	N/A	N/A	N/A	2022-01-05	2022-04-05	1
38	41	male	PDAC	PDAC	12000	head	2-4 cm	1	1	0	28.56	21216	0.134434	0	22152	0	N/A	N/A	N/A	N/A	N/A	N/A	2021-12-16	2023-04-01	1
39	73	female	PDAC	PDAC	9.7	head	2-4 cm	1	0	0	4.944	506.4	0.966864	0	681.6	0	N/A	N/A	N/A	N/A	N/A	N/A	2022-01-10	N/A	N/A
40	61	male	PDAC	PDAC	37	body + tail	2-4 cm	1	0	0	0	10680	0	0	13920	0	N/A	N/A	N/A	N/A	N/A	N/A	2022-01-10	N/A	0
41	61	male	PDAC	PDAC	0.9	body	2-4 cm	1	0	0	0	1478.4	0	0	1785.6	0	N/A	N/A	N/A	N/A	N/A	N/A	2022-01-11	2022-06-05	1
42	54	female	PDAC	PDAC	22721	N/A	N/A	N/A	N/A	N/A	37.44	6336	0.587438	0	6624	0	N/A	N/A	N/A	N/A	N/A	N/A	2022-01-15	N/A	0
43	70	female	PDAC	PDAC	522	tail	2-4 cm	1	0	1	914.4	7416	10.9767	0	16872	0	N/A	N/A	N/A	N/A	N/A	N/A	2022-01-18	N/A	N/A
44	61	male	PDAC	PDAC	32	tail	>4 cm	1	0	1	0	3648	0	0	3888	0	N/A	N/A	N/A	N/A	N/A	N/A	2022-01-20	N/A	0
45	84	female	PDAC	PDAC	13.7	head + body	>4 cm	1	1	0	5.64	453.6	1.22812	0	441.6	0	N/A	N/A	N/A	N/A	N/A	N/A	2022-01-27	N/A	0
46	75	female	PDAC	PDAC	1	head	>4 cm	1	0	1	0	1581.6	0	0	1312.8	0	N/A	N/A	N/A	N/A	N/A	N/A	2022-01-27	N/A	N/A
47	66	male	PDAC	PDAC	4439	body	>4 cm	1	0	1	18.36	1634.4	1.11087	0	261.6	0	N/A	N/A	N/A	N/A	N/A	N/A	2022-01-27	2022-03-24	1
48	73	female	PDAC	PDAC	1000	head + body	2-4 cm	1	0	0	2.952	264	1.10582	0	5856	0	N/A	N/A	N/A	N/A	N/A	N/A	2022-02-14	2022-06-04	1
49	62	male	PDAC	PDAC	70.1	tail	>4 cm	1	0	1	0	588	0	0	256.8	0	N/A	N/A	N/A	N/A	N/A	N/A	2022-02-01	2022-10-23	1
50	60	male	PDAC	PDAC	2416	tail	>4 cm	1	0	1	0	470.4	0	0	643.2	0	N/A	N/A	N/A	N/A	N/A	N/A	2022-02-01	N/A	0
51	67	male	PDAC	PDAC	15.5	head	2-4 cm	1	1	0	0	578.4	0	0	412.8	0	N/A	N/A	N/A	N/A	N/A	N/A	2022-02-04	N/A	0
52	77	female	PDAC	PDAC	0.8	head + body	>4 cm	1	0	1	3.84	921.6	0.414938	0	21912	0	N/A	N/A	N/A	N/A	N/A	N/A	2022-02-08	2022-03-25	1
53	46	male	PDAC	PDAC	1	head	2-4 cm	0	1	0	2.28	1802	0.126366	0	2200	0	N/A	N/A	N/A	N/A	N/A	N/A	2022-02-24	N/A	N/A
54	86	female	PDAC	PDAC	32	tail	2-4 cm	1	0	0	0	1332	0	0	1570	0	N/A	N/A	N/A	N/A	N/A	N/A	2022-02-24	N/A	0
55	76	female	PDAC	PDAC	0.8	head	2-4 cm	1	1	1	6.1	6460	0.0943382	0	8040	0	N/A	N/A	N/A	N/A	N/A	N/A	2022-03-24	2022-08-15	1
56	76	female	PDAC	PDAC	26	body	2-4 cm	1	0	1	0	4480	0	0	5220	0	N/A	N/A	N/A	N/A	N/A	N/A	2022-04-08	N/A	0
57	66	female	PDAC	PDAC	16	body	<2 cm	0	0	0	0	3060	0	0	2860	0	N/A	N/A	N/A	N/A	N/A	N/A	2022-04-08	N/A	0
58	57	female	PDAC	PDAC	0.8	N/A	N/A	N/A	N/A	N/A	8.64	5220	0.165244	0	6740	0	N/A	N/A	N/A	N/A	N/A	N/A	2022-04-07	N/A	N/A
59	71	male	PDAC	PDAC	0.8	head	>4 cm	1	1	0	0	5480	0	0	6440	0	N/A	N/A	N/A	N/A	N/A	N/A	2022-04-27	N/A	N/A
60	47	female	PDAC	PDAC	470	head + body	2-4 cm	1	0	0	5.84	3680	0.158444	0	4160	0	N/A	N/A	N/A	N/A	N/A	N/A	2022-04-25	N/A	0
61	68	female	PDAC	PDAC	2.6	head	2-4 cm	1	1	0	9.04	7060	0.127882	0	8220	0	N/A	N/A	N/A	N/A	N/A	N/A	2022-04-18	N/A	0
62	86	male	PDAC	PDAC	295	body + tail	>4 cm	1	1	0	10.9	34960	0.0311688	0	43140	0	N/A	N/A	N/A	N/A	N/A	N/A	2022-04-15	N/A	0
63	71	male	PDAC	PDAC	0.8	body	2-4 cm	1	1	1	16.08	69840	0.0230188	0	78760	0	N/A	N/A	N/A	N/A	N/A	N/A	2022-04-14	2022-06-18	1
64	78	male	PDAC	PDAC	100	tail	<2 cm	1	0	0	0	3140	0	0	3600	0	N/A	N/A	N/A	N/A	N/A	N/A	2022-05-03	2023-01-01	1
65	53	male	PDAC	PDAC	0.8	body + tail	>4 cm	1	0	0	5.78	1554	0.370565	0	2340	0	N/A	N/A	N/A	N/A	N/A	N/A	2022-05-03	N/A	0
66	61	female	PDAC	PDAC	1428	head + body	>4 cm	1	1	0	7.28	10960	0.0663793	0	11180	0	N/A	N/A	N/A	N/A	N/A	N/A	2022-05-03	N/A	0
67	60	male	PDAC	PDAC	305	head	2-4 cm	1	0	0	0	3140	0	0	3620	0	N/A	N/A	N/A	N/A	N/A	N/A	2022-03-21	N/A	N/A
68	44	male	PDAC	PDAC	289	head	>4 cm	1	1	1	40.6	7140	0.565412	0	8200	0	N/A	N/A	N/A	N/A	N/A	N/A	2022-03-04	2022-12-01	1
69	76	female	PDAC	PDAC	2	head	2-4 cm	1	0	0	90.8	3260	2.7098	0	3360	0	N/A	N/A	N/A	N/A	N/A	N/A	2022-05-11	2022-12-21	1
70	74	male	PDAC	PDAC	85.4	body	2-4 cm	1	0	0	2.48	1856	0.133442	0	1792	0	N/A	N/A	N/A	N/A	N/A	N/A	2022-05-18	N/A	0
71	65	female	PDAC	PDAC	7	tail + body	>4 cm	1	0	1	5.28	3160	0.16681	0	3440	0	N/A	N/A	N/A	N/A	N/A	N/A	2022-05-19	2023-08-01	1
72	69	male	PDAC	PDAC	20002	head	2-4 cm	1	0	1	2580	10540	19.6646	0	14280	0	N/A	N/A	N/A	N/A	N/A	N/A	2022-05-24	2022-07-03	1
73	63	female	PDAC	PDAC	9.2	head	>4 cm	1	0	0	0	11940	0	0	12280	0	N/A	N/A	N/A	N/A	N/A	N/A	2022-05-24	2022-12-15	1
74	66	female	PDAC	PDAC	2300	tail	>4 cm	1	0	1	64	3140	1.9975	0	3640	0	N/A	N/A	N/A	N/A	N/A	N/A	2022-05-22	2022-10-01	1
75	56	male	PDAC	PDAC	2086	head	2-4 cm	0	1	1	13.18	23940	0.055024	0	22340	0	N/A	N/A	N/A	N/A	N/A	N/A	2022-05-24	2023-01-10	1
76	86	female	PDAC	PDAC	0.8	N/A	N/A	N/A	N/A	N/A	5.38	3160	0.169964	0	3720	0	N/A	N/A	N/A	N/A	N/A	N/A	2022-05-20	2023-03-20	1
77	47	female	PDAC	PDAC	51	body + tail	2-4 cm	1	0	0	0	1684	0	0	1908	0	N/A	N/A	N/A	N/A	N/A	N/A	2022-05-20	N/A	0
78	73	female	PDAC	PDAC	0.8	head	>4 cm	1	1	1	0	4500	0	0	5260	0	N/A	N/A	N/A	N/A	N/A	N/A	2022-05-31	N/A	N/A
79	67	female	PDAC	PDAC	1343	head + body	>4 cm	1	0	1	8.3	9720	0.0853181	0	11000	0	N/A	N/A	N/A	N/A	N/A	N/A	2022-06-29	2022-10-28	1
80	59	female	PDAC	PDAC	4.2	body + tail	<2 cm	1	0	0	0	682	0	0	788	0	N/A	N/A	N/A	N/A	N/A	N/A	2022-06-27	N/A	0
81	72	female	PDAC	PDAC	24	tail	>4 cm	1	0	1	0	2400	0	0	2640	0	N/A	N/A	N/A	N/A	N/A	N/A	2022-06-22	N/A	0
82	54	male	PDAC	PDAC	71	head	2-4 cm	1	0	1	16.74	806	2.03466	0	1100	0	N/A	N/A	N/A	N/A	N/A	N/A	2022-06-22	2023-07-25	1
83	62	male	PDAC	PDAC	1250	head + body	>4 cm	1	0	1	0	1914	0	0	1878	0	N/A	N/A	N/A	N/A	N/A	N/A	2022-08-08	N/A	0
84	57	male	PDAC	PDAC	13013	tail	>4 cm	1	0	1	36840	35580	50.8699	0	66660	0	N/A	N/A	N/A	N/A	N/A	N/A	2022-08-05	2023-01-12	1
85	64	male	PDAC	PDAC	10.9	body + tail	2-4 cm	1	0	0	10.48	16560	0.063245	0	15440	0	N/A	N/A	N/A	N/A	N/A	N/A	2022-08-01	N/A	0
86	63	female	PDAC	PDAC	24.1	head	<2 cm	0	0	0	0	2740	0	0	2860	0	N/A	N/A	N/A	N/A	N/A	N/A	2022-08-01	N/A	0
87	42	male	PDAC	PDAC	0.8	head	>4 cm	1	1	1	0	10900	0	0	10920	0	N/A	N/A	N/A	N/A	N/A	N/A	2022-07-29	N/A	N/A
88	71	male	PDAC	PDAC	35.9	body + tail	>4 cm	1	0	1	92.2	46800	0.196621	0	58080	0	N/A	N/A	N/A	N/A	N/A	N/A	2022-07-28	2022-08-13	1
89	59	female	PDAC	PDAC	0.8	head	>4 cm	1	1	0	0	1588	0	0	1998	0	N/A	N/A	N/A	N/A	N/A	N/A	2022-07-21	2023-07-25	1
90	64	male	PDAC	PDAC	69	head	<2 cm	1	0	1	0	6380	0	0	5560	0	N/A	N/A	N/A	N/A	N/A	N/A	2022-07-16	N/A	0
91	75	female	PDAC	PDAC	20020	body + tail	2-4 cm	1	0	1	12.64	2860	0.440013	0	2920	0	N/A	N/A	N/A	N/A	N/A	N/A	2022-07-06	N/A	0
92	86	female	PDAC	PDAC	0.8	N/A	N/A	N/A	N/A	N/A	0	4400	0	0	5780	0	N/A	N/A	N/A	N/A	N/A	N/A	2022-07-06	N/A	N/A
93	67	male	PDAC	PDAC	125	body + tail	>4 cm	1	0	1	22.4	1192	1.84453	0	1414	0	N/A	N/A	N/A	N/A	N/A	N/A	2022-08-17	N/A	N/A
94	46	male	PDAC	PDAC	6.4	head	<2 cm	0	0	0	2.36	3520	0.0670005	0	3940	0	N/A	N/A	N/A	N/A	N/A	N/A	2022-11-07	2023-05-19	1
95	45	female	PDAC	PDAC	11880	N/A	N/A	N/A	N/A	N/A	3940	18700	0.174028	0	19460	0	N/A	N/A	N/A	N/A	N/A	N/A	2022-11-05	2023-04-22	1
96	66	female	mdIPMN	OPN	2.4	N/A	N/A	N/A	N/A	N/A	0	636	0	0	175.68	0	N/A	N/A	N/A	N/A	N/A	N/A	2021-12-13	N/A	0
97	57	female	NET	OPN	0.8	tail	2-4 cm	1	0	1	0	1312	0	0	1624	0	N/A	N/A	N/A	N/A	N/A	N/A	2022-05-04	N/A	0
98	49	male	SPPN	OPN	0.8	tail	2-4 cm	1	0	0	0	978	0	0	824	0	N/A	N/A	N/A	N/A	N/A	N/A	2022-05-24	N/A	0
99	49	female	multIPMN	OPN	6.6	N/A	N/A	N/A	N/A	N/A	0	1204	0	0	1214	0	N/A	N/A	N/A	N/A	N/A	N/A	2022-07-14	N/A	0
100	64	female	mdIPMN	OPN	32	N/A	N/A	N/A	N/A	N/A	0	1280	0	0	1506	0	N/A	N/A	N/A	N/A	N/A	N/A	2022-11-07	N/A	0
101	63	female	SCA	OPN	7.3	N/A	N/A	N/A	N/A	N/A	2.34	2020	0.115708	0	2980	0	N/A	N/A	N/A	N/A	N/A	N/A	2022-11-07	N/A	0
102	43	female	mdIPMN	OPN	0.8	N/A	N/A	N/A	N/A	N/A	0	1024	0	0	1478	0	N/A	N/A	N/A	N/A	N/A	N/A	2022-11-05	N/A	0
103	64	female	Adenoma	OPN	0.8	N/A	N/A	N/A	N/A	N/A	0	3500	0	0	4160	0	N/A	N/A	N/A	N/A	N/A	N/A	2022-11-03	N/A	0
104	49	male	mdIPMN	OPN	3.3	N/A	N/A	N/A	N/A	N/A	0	9920	0	0	11440	0	N/A	N/A	N/A	N/A	N/A	N/A	2022-10-29	N/A	0
105	55	male	bdIPMN	OPN	22.4	N/A	N/A	N/A	N/A	N/A	0	30420	0	0	31480	0	N/A	N/A	N/A	N/A	N/A	N/A	2022-10-26	N/A	0
106	64	female	mdIPMN	OPN	8.1	N/A	N/A	N/A	N/A	N/A	0	15.24	0	0	368	0	N/A	N/A	N/A	N/A	N/A	N/A	2022-10-24	N/A	0
107	63	female	mdIPMN	OPN	0.8	N/A	N/A	N/A	N/A	N/A	0	1396	0	0	1886	0	N/A	N/A	N/A	N/A	N/A	N/A	2022-11-12	N/A	0
108	50	female	bdIPMN	OPN	4.4	N/A	N/A	N/A	N/A	N/A	0	1298	0	0	1612	0	N/A	N/A	N/A	N/A	N/A	N/A	2022-12-14	N/A	0
109	66	male	bdIPMN	OPN	20.9	N/A	N/A	N/A	N/A	N/A	0	2060	0	0	2540	0	N/A	N/A	N/A	N/A	N/A	N/A	2022-12-10	N/A	0
110	65	female	bdIPMN	OPN	0.8	N/A	N/A	N/A	N/A	N/A	0	1192	0	0	1570	0	N/A	N/A	N/A	N/A	N/A	N/A	2022-12-05	N/A	0
111	60	female	bdIPMN	OPN	10	N/A	N/A	N/A	N/A	N/A	0	1902	0	0	2420	0	N/A	N/A	N/A	N/A	N/A	N/A	2022-12-05	N/A	0
112	65	female	bdIPMN	OPN	0.8	N/A	N/A	N/A	N/A	N/A	0	3760	0	0	26.2	0	N/A	N/A	N/A	N/A	N/A	N/A	2022-11-25	N/A	0
113	58	male	bdIPMN	OPN	4.6	N/A	N/A	N/A	N/A	N/A	0	2080	0	0	2700	0	N/A	N/A	N/A	N/A	N/A	N/A	2022-11-22	N/A	0

## Sheet: Notes
PDAC, pancreatic ductal adenocarcinoma
OPN, other pancreatic neoplasms
SPPN, solid pseudopapillary neoplasm
SCA, serous cystadenoma
NET, neuroendocrine tumor
mdIPMN, main duct intraductal papillary mucinous neoplasm
multIPMN, multifocal intraductal papillary mucinous neoplasm
bdIPMN, branch duct intraductal papillary mucinous neoplasm
Dates are presented in the following format: DD/MM/YYYY
Qualitative data are presented in the following format: 1 - yes; 0 - no
N/A, not applicable or not available
Plasma_G12/G13_mut (cop./mL), levels of cell-free tumor DNA carrying KRAS mutations in G12/G13 hotspot in plasma expressed as copies per 1 mL of biomaterial
Plasma_Q61_mut (cop./mL), levels of cell-free tumor DNA carrying KRAS mutations in Q61 hotspot in plasma expressed as copies per 1 mL of biomaterial
Bile_G12/G13_mut (cop./mL), levels of cell-free tumor DNA carrying KRAS mutations in G12/G13 hotspot in bile expressed as copies per 1 mL of biomaterial
Bile_Q61_mut (cop./mL), levels of cell-free tumor DNA carrying KRAS mutations in Q61 hotspot in bile expressed as copies per 1 mL of biomaterial
fract (%), cell-free tumor DNA fraction expressed in % of total cell-free DNA
Cell-free tumor DNA was not detected in any of the samples from the control group
